# Supplementary material
Source: publisher figshare collection journal article supplement (https://acs.figshare.com/ndownloader/files/4544893)

## Supporting Information

### Fluorescein Redirects a Ruthenium-Octaarginine Conjugate to the Nucleus

Cindy A. Puckett and Jacqueline K. Barton\*  
Division of Chemistry and Chemical Engineering  
California Institute of Technology, Pasadena, CA

**Figure S1.** Spectral confocal imaging (10.7 nm bandwidth) of HeLa cells incubated with 10  $\mu$ M Ru-D-R8-fluor for 60 min at 37 °C in complete medium. (A) Emission at 521 nm. (B) Emission at 618 nm. (C) Emission spectra from nuclear (red) and cytoplasmic (green) regions. Fluorescein (521 nm) and ruthenium (618 nm) emission from the nucleus are apparent.

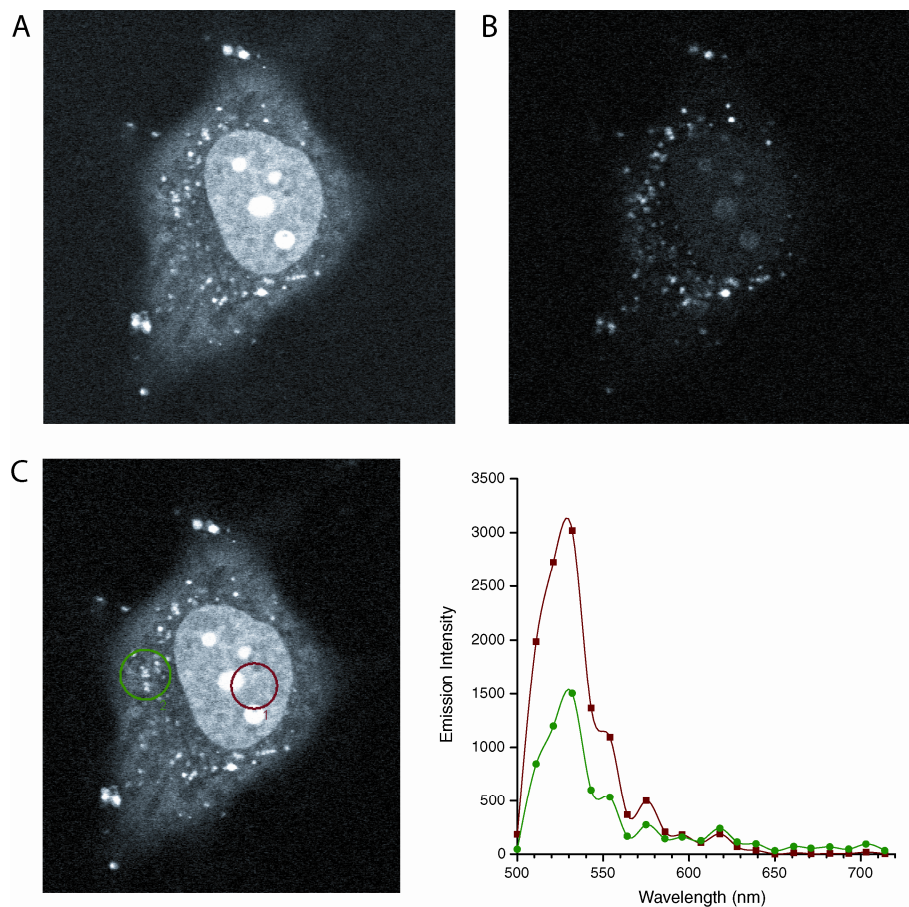

Supplement: Supplementary file 1 [file 4544893]
